# Supplementary material for: Structural evolution and enhancement of luminescence in the Eu-doped oxyfluoride glass ceramics containing NaGdF4 nanocrystals
Source: Royal Society of Chemistry journal article supplement (doi:10.1039/c3ce40629f), 2013-01-01

## Supporting information

### Structural evolution and enhancement of luminescence in the Eu-doped oxyfluoride glass ceramics containing NaGdF<sub>4</sub> nanocrystals

Shilong Zhao<sup>a</sup>, Xiuli Wang<sup>b</sup>, Xiao Sun<sup>a</sup>, Guohua Jia<sup>a</sup>, Lihui Huang<sup>a</sup>, Degang Deng<sup>a</sup>, Fengxia Xin<sup>a</sup>, and Shiqing Xu<sup>\*a</sup>

<sup>a</sup>College of Materials Science and Engineering, China Jiliang University, Hangzhou 310018, P. R. China. E-mail: Sxucjlu@hotmail.com

<sup>b</sup>College of Materials, Chemistry and Chemical Engineering, Hangzhou Normal University, Hangzhou 310036, P.R. China E-mail: xlwang\_hztc@hotmail.com

**Fig.S1** Crystallite size distribution of  $\alpha$ -NaGdF<sub>4</sub> and  $\beta$ -NaGdF<sub>4</sub> nanocrystals in the glass ceramics

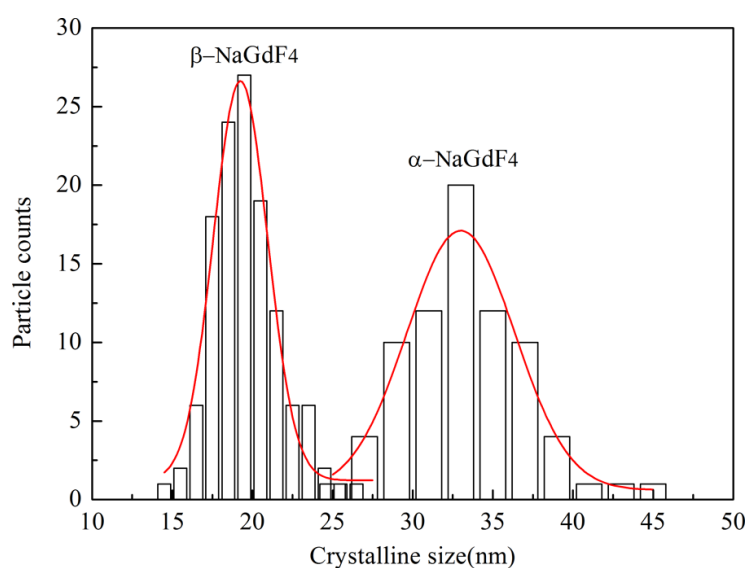

**Fig.S3** Emission spectra of Eu<sup>3+</sup> ions in the precursor glass and glass ceramics ( $x = 10$ )

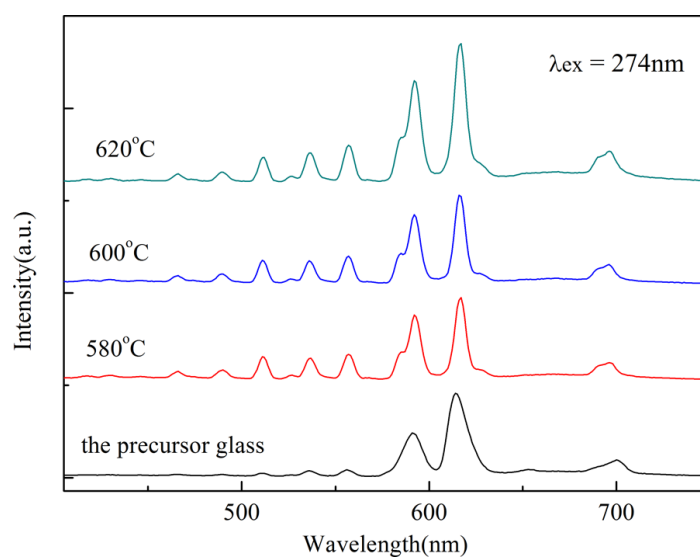

Supplement: c3ce40629f.pdf [file c3ce40629f.pdf]
